# Supplementary material
Source: Elsevier journal article supplement (https://www.sciencedirect.com/science/article/pii/S1578219019301805)
Supplement: mmc2 [file S1578219019301805:mmc2.pdf]

Tabla **S1**. Resultados del cuestionario inicial completado por el panel de expertos.

|                                                                                                                             | n (%)     |
|-----------------------------------------------------------------------------------------------------------------------------|-----------|
| <i>Distribución geográfica de los expertos</i>                                                                              |           |
| Galicia                                                                                                                     | 1 (6,7)   |
| País Vasco                                                                                                                  | 1 (6,7)   |
| Aragón                                                                                                                      | 1 (6,7)   |
| Cataluña                                                                                                                    | 3 (20,0)  |
| Comunidad de Madrid                                                                                                         | 5 (33,3)  |
| Comunidad Valenciana                                                                                                        | 1 (6,7)   |
| Andalucía                                                                                                                   | 1 (6,7)   |
| Islas Baleares                                                                                                              | 1 (6,7)   |
| Islas Canarias                                                                                                              | 1 (6,7)   |
| <i>Lugar donde ejerce su actividad</i>                                                                                      |           |
| Sanidad pública                                                                                                             | 0 (0)     |
| Sanidad privada                                                                                                             | 5 (33,3)  |
| Ambas                                                                                                                       | 10 (66,7) |
| <i>Número medio de pacientes que visita a la semana</i>                                                                     |           |
| < 30                                                                                                                        | 0 (0)     |
| Entre 30 – 50                                                                                                               | 1 (6,7)   |
| > 50                                                                                                                        | 14 (93,3) |
| <i>Número de pacientes que consultan por problemas de rosácea</i>                                                           |           |
| 0 – 5 por semana                                                                                                            | 0 (0)     |
| 5 – 10 por semana                                                                                                           | 7 (46,7)  |
| 10 – 15 por semana                                                                                                          | 5 (33,3)  |
| > 15 por semana                                                                                                             | 2 (13,3)  |
| NS / NC                                                                                                                     | 1 (6,7)   |
| <i>¿Cómo se distribuyen los pacientes con rosácea que acuden a su consulta en función de su gravedad?</i>                   |           |
| Rosácea leve                                                                                                                | 50%       |
| Rosácea moderada                                                                                                            | 38%       |
| Rosácea grave                                                                                                               | 12%       |
| <i>¿Está de acuerdo con la clasificación de la rosácea en eritematotelangiectásica, papulopustulosa, fimatosa y ocular?</i> |           |
| SI                                                                                                                          | 13 (86,7) |
| NO                                                                                                                          | 2 (13,3)  |
| <i>¿Qué criterio sigue para determinar el grado de rosácea del paciente?</i>                                                |           |
| Subtipo clínico anterior                                                                                                    | 10 (66,7) |
| Número de lesiones (en la papulopustulosa)                                                                                  | 1 (6,7)   |
| Impacto sobre la calidad de vida (DLQI)                                                                                     | 0 (0)     |
| NS / NC                                                                                                                     | 4 (26,7)  |

|                                                                                                                                |                                                 |
|--------------------------------------------------------------------------------------------------------------------------------|-------------------------------------------------|
| <p><i>¿Es importante para usted el problema de las resistencias antibióticas?</i></p> <p>SI</p> <p>NO</p> <p>NS / NC</p>       | <p>8 (53,3)</p> <p>4 (26,7)</p> <p>3 (20,0)</p> |
| <p><i>En su opinión, ¿los tratamientos dermatológicos contribuyen a las resistencias antibióticas?</i></p> <p>SI</p> <p>NO</p> | <p>12 (80,0)</p> <p>3 (20,0)</p>                |
| <p><i>¿Cree que el tratamiento de la rosácea es completo en la actualidad?</i></p> <p>SI</p> <p>NO</p>                         | <p>5 (33,3)</p> <p>10 (66,7)</p>                |

DLQI: Dermatology Quality of Life Index. NS / NC: no sabe / no contesta
